# Supplementary material for: An efficient and cyclic hydrogen evolution reaction mechanism on [Ni(PH2NH2)2]2+ catalysts: a theoretical and multiscale simulation study
Source: Royal Society of Chemistry journal article supplement (doi:10.1039/c3ra44896g), 2013-10-31
Supplement: c3ra44896g.pdf [file c3ra44896g.pdf]

## Supporting information

### Efficient and Cyclic Hydrogen Evolution Reaction Mechanism on $[\text{Ni}(\text{P}^{\text{H}}_2\text{N}^{\text{H}}_2)_2]^{2+}$ Catalysts: A Theoretical and Multiscale Simulation Study

Dhurairajan Senthilnathan<sup>2\*</sup>, Pablo Giunta<sup>1</sup>, Valentina Vetere<sup>2</sup>, Ali Kachmar<sup>1</sup>, Pascale Maldivi<sup>2\*</sup> and Alejandro A. Franco<sup>1\*</sup>

**S1.** Schematic representation of potential energy profiles of  $\text{Ni}(\text{P}_2^{\text{H}}\text{N}_2^{\text{H}})_2^{2+}$  (D) and  $\text{Ni}(\text{P}_2^{\text{H}}\text{N}_2^{\text{HH}})_2^{2+}$  (A) along with the reaction coordinate change between square planar and tetrahedral for oxidation state +2(D) and 0 (A)

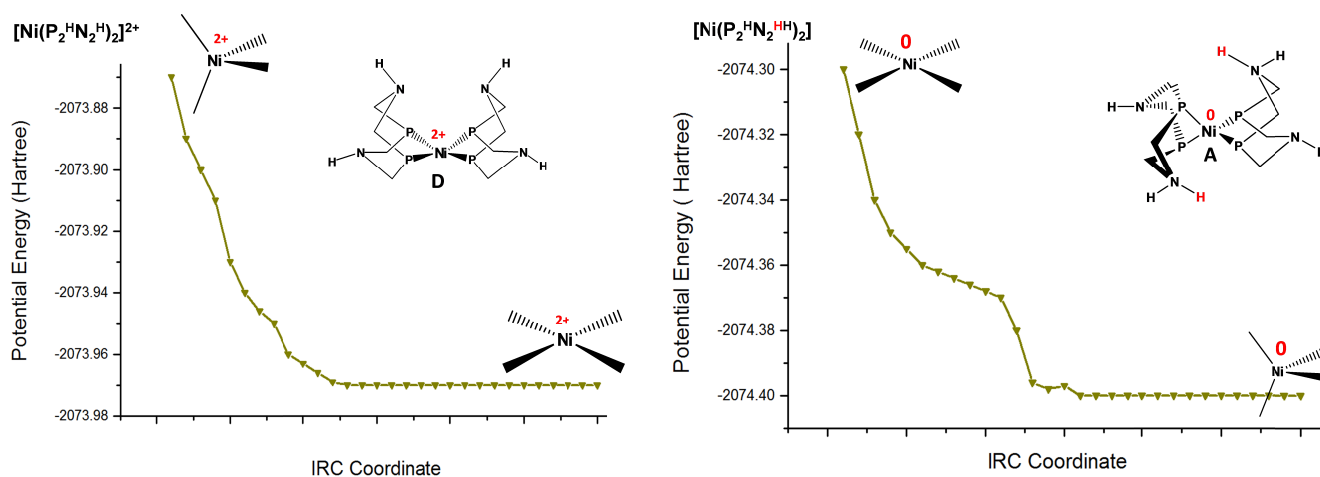

**Cartesian coordinates of reactive species**

**A**

|    |             |             |             |
|----|-------------|-------------|-------------|
| Ni | -0.00146700 | -0.11377500 | 0.02290300  |
| P  | -1.68857900 | -0.67026100 | 1.41475300  |
| P  | -1.55312800 | 0.80965700  | -1.37229500 |
| N  | -2.46525600 | -1.82719600 | -1.02986200 |
| N  | -3.51784900 | 1.27151600  | 0.55662700  |
| C  | -2.92183400 | -1.77634600 | 0.43039800  |
| H  | -2.90556500 | -2.79745700 | 0.81940500  |
| H  | -3.93189900 | -1.36449400 | 0.46237000  |
| C  | -2.78888200 | -0.57972000 | -1.85922800 |
| H  | -3.81980900 | -0.28798900 | -1.65116000 |
| H  | -2.66812800 | -0.84222900 | -2.91338200 |
| C  | -2.84941800 | 0.84362100  | 1.78135800  |
| H  | -3.59874400 | 0.54021400  | 2.51817500  |
| H  | -2.20850200 | 1.61886600  | 2.22857800  |
| C  | -2.76523200 | 2.00759000  | -0.45524900 |
| H  | -2.14581300 | 2.81907800  | -0.04290000 |
| H  | -3.45881400 | 2.43595700  | -1.18471800 |
| P  | 1.54855500  | 1.41096300  | 0.73133400  |
| P  | 1.69883300  | -1.31774100 | -0.85223300 |
| N  | 3.53542400  | 0.78410300  | -1.12704300 |
| N  | 2.43948600  | -1.01011500 | 1.84149000  |
| C  | 2.77778000  | 1.94349600  | -0.66377300 |
| H  | 2.16784900  | 2.41727600  | -1.44859300 |
| H  | 3.46721300  | 2.69097000  | -0.26049800 |
| C  | 2.87454900  | -0.22393300 | -1.94989600 |
| H  | 3.62805800  | -0.87034000 | -2.40882400 |
| H  | 2.24341000  | 0.20053500  | -2.74561400 |
| C  | 2.76622200  | 0.48541800  | 1.89558800  |
| H  | 3.80351200  | 0.62303000  | 1.58512200  |
| H  | 2.62704600  | 0.81756400  | 2.92768700  |
| C  | 2.91325600  | -1.73939000 | 0.58204600  |
| H  | 2.89139700  | -2.81184000 | 0.79083000  |
| H  | 3.92726800  | -1.40911200 | 0.35064800  |
| H  | 1.43698800  | 2.63717500  | 1.47326600  |
| H  | 4.49726500  | 0.98171700  | -1.38746600 |
| H  | 1.79052300  | -2.57368700 | -1.55340600 |
| H  | -2.85641600 | -2.66073300 | -1.48926400 |
| H  | -1.44496700 | 1.45828500  | -2.65050000 |
| H  | -1.77791900 | -1.36845800 | 2.67313700  |
| H  | -4.47664500 | 1.58262700  | 0.68242500  |
| H  | 2.81393300  | -1.47818700 | 2.67777800  |
| H  | -1.41263600 | -1.88389100 | -0.99595900 |
| H  | 1.38597100  | -1.07101600 | 1.82227800  |

**TS<sub>AB</sub>**

|    |             |            |            |
|----|-------------|------------|------------|
| Ni | -0.02301500 | 0.08867400 | 0.18047300 |
|----|-------------|------------|------------|

|   |             |             |             |
|---|-------------|-------------|-------------|
| P | 1.77020700  | 0.05713100  | 1.53043900  |
| P | 1.46224300  | -0.23328900 | -1.57781800 |
| N | 2.43529400  | 2.08717200  | -0.29170100 |
| N | 3.51825100  | -1.38990400 | -0.08974800 |
| C | 2.95538000  | 1.47736800  | 1.01492200  |
| H | 2.95512800  | 2.26621600  | 1.77151500  |
| H | 3.96804200  | 1.10981000  | 0.84050300  |
| C | 2.68271800  | 1.24728000  | -1.55149000 |
| H | 3.71902100  | 0.90498000  | -1.53083500 |
| H | 2.51120200  | 1.89357300  | -2.41624500 |
| C | 2.92970100  | -1.46626600 | 1.24415600  |
| H | 3.72338000  | -1.45159900 | 1.99662600  |
| H | 2.30785500  | -2.35958800 | 1.40547600  |
| C | 2.69171300  | -1.69155600 | -1.25450400 |
| H | 2.07304300  | -2.59415600 | -1.13842800 |
| H | 3.33043600  | -1.81655400 | -2.13332600 |
| P | -1.59989300 | -1.62128000 | 0.22551900  |
| P | -1.70392300 | 1.55700100  | -0.37263500 |
| N | -3.55026800 | -0.33814600 | -1.30512900 |
| N | -2.27398700 | 0.35005900  | 2.03261900  |
| C | -2.84240700 | -1.60947800 | -1.25501400 |
| H | -2.25773700 | -1.82268700 | -2.16361400 |
| H | -3.56146700 | -2.42116900 | -1.11097100 |
| C | -2.87503300 | 0.86482100  | -1.76006900 |
| H | -3.61490500 | 1.63526300  | -1.99553300 |
| H | -2.24455300 | 0.70515200  | -2.64833400 |
| C | -2.71023100 | -1.03549000 | 1.68573800  |
| H | -3.76347300 | -1.06693800 | 1.39461100  |
| H | -2.54522700 | -1.68897600 | 2.54576900  |
| C | -2.82101500 | 1.45469500  | 1.19358700  |
| H | -2.75572600 | 2.39559600  | 1.74490600  |
| H | -3.85655700 | 1.26636200  | 0.89932300  |
| H | -1.48475600 | -3.02765300 | 0.48627000  |
| H | -4.54197400 | -0.39290900 | -1.50958400 |
| H | -1.74252600 | 2.96511300  | -0.66566400 |
| H | 2.84218200  | 3.02434400  | -0.42012200 |
| H | 1.25570800  | -0.32829700 | -2.99380000 |
| H | 1.81804700  | 0.20916300  | 2.95411600  |
| H | 4.47742700  | -1.71908600 | -0.15191100 |
| H | -2.33654800 | 0.54494200  | 3.03441500  |
| H | 1.39356500  | 2.15966200  | -0.18248600 |
| H | -0.92465900 | 0.32060400  | 1.52527200  |

## B

|    |             |             |             |
|----|-------------|-------------|-------------|
| Ni | -0.02064100 | -0.37490000 | -0.38573300 |
| P  | 1.35039600  | 1.42986100  | -0.27321500 |
| P  | 1.65992400  | -1.53672000 | 0.32860700  |
| N  | 2.73078700  | -0.32726600 | -1.93827400 |
| N  | 3.15235800  | 0.41677300  | 1.51809900  |

|   |             |             |             |
|---|-------------|-------------|-------------|
| C | 2.81546100  | 1.10355700  | -1.43667700 |
| H | 2.75758200  | 1.75383000  | -2.32251800 |
| H | 3.78564100  | 1.22819000  | -0.93393600 |
| C | 3.05901900  | -1.40888100 | -0.93513900 |
| H | 4.00948500  | -1.15171700 | -0.44537100 |
| H | 3.15045100  | -2.35450100 | -1.49078700 |
| C | 2.29356800  | 1.58849400  | 1.35805900  |
| H | 2.92706700  | 2.48918800  | 1.33292100  |
| H | 1.54042600  | 1.71911700  | 2.16349300  |
| C | 2.50201000  | -0.84032800 | 1.86576900  |
| H | 1.73074600  | -0.76076700 | 2.66098200  |
| H | 3.26466100  | -1.56115500 | 2.20309800  |
| P | -1.38640200 | -0.40338800 | 1.37406000  |
| P | -1.81060100 | 0.20791600  | -1.45677200 |
| N | -3.68702500 | -1.01415800 | 0.06648700  |
| N | -1.88491200 | 2.14826100  | 0.51269300  |
| C | -2.83588400 | -1.57765000 | 1.10307000  |
| H | -2.42110400 | -2.58339700 | 0.87730800  |
| H | -3.41202200 | -1.64229300 | 2.04034600  |
| C | -3.19115400 | -1.05684200 | -1.29937200 |
| H | -4.00283100 | -0.76510400 | -1.98609300 |
| H | -2.78692500 | -2.03724800 | -1.62980800 |
| C | -2.21404300 | 1.26984800  | 1.63604500  |
| H | -3.29941200 | 1.08385500  | 1.77159800  |
| H | -1.80981800 | 1.70821600  | 2.56211500  |
| C | -2.54051100 | 1.79972600  | -0.74530100 |
| H | -2.35889300 | 2.60095100  | -1.47907400 |
| H | -3.63429000 | 1.62888900  | -0.66240200 |
| H | 0.12249000  | -1.11646600 | -1.69195900 |
| H | 1.71638800  | -0.49282000 | -2.19667100 |
| H | 3.92153700  | 0.61506100  | 2.16206500  |
| H | 1.10685700  | 2.79330100  | -0.60536800 |
| H | 3.32111100  | -0.44249200 | -2.77847600 |
| H | 1.64752100  | -2.94426800 | 0.56028800  |
| H | -1.72368000 | 0.44479600  | -2.85551800 |
| H | -4.64603300 | -1.35892500 | 0.13249200  |
| H | -0.93684400 | -0.77490100 | 2.67491300  |
| H | -2.10117300 | 3.11999100  | 0.75494500  |

### TS<sub>BC</sub>

|    |             |             |             |
|----|-------------|-------------|-------------|
| Ni | -0.03003000 | -0.11674100 | -0.40742600 |
| P  | -1.56074500 | 1.49092000  | 0.07865500  |
| H  | -1.15167700 | 2.85813200  | 0.13476500  |
| P  | 1.69517700  | 1.27268200  | -0.91703300 |
| H  | 1.50091100  | 2.38327000  | -1.79453200 |
| P  | 1.74284400  | -1.20825500 | 1.03165400  |
| H  | 1.65273700  | -2.35464200 | 1.88358000  |
| P  | -1.79008200 | -1.50329500 | -0.11790600 |
| H  | -1.51543400 | -2.89545000 | -0.25802000 |
| C  | 2.65453200  | 2.00986300  | 0.59786500  |

|   |             |             |             |
|---|-------------|-------------|-------------|
| N | 3.45445400  | 0.98162500  | 1.22764100  |
| H | 4.41006200  | 1.23297800  | 1.45545300  |
| C | 3.02484500  | 0.19585100  | -1.79324000 |
| N | 2.70473100  | -1.23964200 | -1.61027000 |
| C | 2.82788600  | -0.01259400 | 2.08984500  |
| C | 3.01683600  | -1.82812500 | -0.27448100 |
| C | -3.19047600 | -1.07676200 | -1.42930500 |
| N | -3.78051200 | 0.22033100  | -1.22566500 |
| H | -4.57206500 | 0.24263600  | -0.59402500 |
| C | -2.58016500 | -1.31968900 | 1.62755800  |
| N | -3.21005200 | -0.01571100 | 1.76097200  |
| H | -4.07962500 | 0.01099700  | 2.28224900  |
| C | -3.00059000 | 1.42413200  | -1.28074300 |
| C | -2.40765300 | 1.19616500  | 1.78940800  |
| H | 3.29955200  | 2.80774500  | 0.21865900  |
| H | 1.89980200  | 2.45900100  | 1.26042000  |
| H | 2.16964200  | 0.42226700  | 2.85750100  |
| H | 3.60470300  | -0.59590000 | 2.59228300  |
| H | 3.02008000  | 0.43485700  | -2.85941300 |
| H | 3.99424500  | 0.45651400  | -1.35478300 |
| H | 4.02758800  | -1.56188500 | 0.05558200  |
| H | 2.93811800  | -2.91590700 | -0.34716200 |
| H | -3.63881800 | 2.29783000  | -1.12578500 |
| H | -2.47623400 | 1.52795500  | -2.23627300 |
| H | -2.69130700 | -1.15025500 | -2.40145300 |
| H | -3.95717600 | -1.85348800 | -1.36703500 |
| H | -1.59544800 | 1.17882900  | 2.53420000  |
| H | -3.05053900 | 2.05557400  | 2.00274500  |
| H | -3.33316400 | -2.10468000 | 1.74731700  |
| H | -1.77153000 | -1.50474900 | 2.35335200  |
| H | 0.31820800  | -1.08091500 | -1.73012700 |
| H | 1.21071400  | -1.20904200 | -1.68652000 |
| H | 3.06794100  | -1.81298100 | -2.37575400 |

## C

|    |            |             |             |
|----|------------|-------------|-------------|
| Ni | 0.00008300 | -0.21974400 | -0.00041900 |
| P  | 1.64301300 | 0.04770900  | -1.45709200 |
| P  | 1.64278900 | 0.04383000  | 1.45728100  |
| N  | 2.69957500 | -2.02102000 | -0.00250000 |
| N  | 3.32441200 | 1.58942300  | 0.00204500  |
| C  | 2.96104800 | -1.29112800 | -1.23200900 |
| H  | 2.88430100 | -1.98010400 | -2.08766300 |
| H  | 3.94236300 | -0.77416800 | -1.26734200 |
| C  | 2.96075200 | -1.29455500 | 1.22908000  |
| H  | 3.94211300 | -0.77779900 | 1.26620400  |
| H  | 2.88361300 | -1.98584800 | 2.08283100  |
| C  | 2.57166500 | 1.66890300  | -1.23674700 |
| H  | 3.27408700 | 1.77099000  | -2.08047100 |
| H  | 1.83702100 | 2.50068800  | -1.29536400 |
| C  | 2.57152600 | 1.66557200  | 1.24095800  |

|   |             |             |             |
|---|-------------|-------------|-------------|
| H | 1.83680600  | 2.49714700  | 1.30169500  |
| H | 3.27386600  | 1.76555400  | 2.08500100  |
| P | -1.64286100 | 0.04803300  | -1.45709400 |
| P | -1.64294800 | 0.04356800  | 1.45712600  |
| N | -3.32484900 | 1.58906100  | 0.00235600  |
| N | -2.69914200 | -2.02125600 | -0.00318900 |
| C | -2.57182500 | 1.66906800  | -1.23621700 |
| H | -1.83724000 | 2.50093700  | -1.29432000 |
| H | -3.27402800 | 1.77141500  | -2.08008500 |
| C | -2.57217700 | 1.66505800  | 1.24139900  |
| H | -3.27464700 | 1.76436500  | 2.08541600  |
| H | -1.83783100 | 2.49693000  | 1.30255200  |
| C | -2.96073600 | -1.29098500 | -1.23249300 |
| H | -3.94209400 | -0.77409700 | -1.26762700 |
| H | -2.88395800 | -1.97971300 | -2.08834600 |
| C | -2.96047900 | -1.29510400 | 1.22859400  |
| H | -2.88305900 | -1.98659200 | 2.08216800  |
| H | -3.94204600 | -0.77874800 | 1.26590100  |
| H | -1.31966000 | 0.02641200  | 2.84399900  |
| H | 1.31973500  | 0.03394700  | -2.84400700 |
| H | 3.14714000  | -2.94035900 | -0.00373900 |
| H | -1.31969900 | 0.03514300  | -2.84404900 |
| H | 4.13510300  | 2.21052700  | 0.00293100  |
| H | -4.13571300 | 2.20993900  | 0.00324800  |
| H | -3.14697500 | -2.94048100 | -0.00468400 |
| H | 1.31946500  | 0.02734900  | 2.84415900  |
| H | -0.39847900 | -2.11115000 | -0.00330600 |
| H | 0.39898200  | -2.11097000 | -0.00306600 |

### TS<sub>cc</sub>

|    |             |             |             |
|----|-------------|-------------|-------------|
| Ni | -0.00000048 | -0.34316500 | -0.00002168 |
| P  | -1.64077707 | -0.00028289 | 1.45329395  |
| P  | -1.64076792 | -0.00009600 | -1.45330354 |
| N  | -2.88450675 | -1.96118394 | -0.00013480 |
| N  | -3.17563211 | 1.69192796  | 0.00009918  |
| C  | -3.07372307 | -1.21379168 | 1.22871141  |
| H  | -3.05358874 | -1.90728871 | 2.08414389  |
| H  | -4.00329786 | -0.60749539 | 1.27556322  |
| C  | -3.07371533 | -1.21363366 | -1.22888608 |
| H  | -4.00328983 | -0.60733135 | -1.27566577 |
| H  | -3.05357561 | -1.90702068 | -2.08440760 |
| C  | -2.42096376 | 1.69926021  | 1.23943102  |
| H  | -3.11285668 | 1.86015296  | 2.08266269  |
| H  | -1.61577238 | 2.46310003  | 1.30241742  |
| C  | -2.42095595 | 1.69941958  | -1.23922697 |
| H  | -1.61576418 | 2.46326750  | -1.30211007 |
| H  | -3.11284357 | 1.86042077  | -2.08244229 |
| P  | 1.64076793  | -0.00028750 | 1.45330428  |
| P  | 1.64077708  | -0.00010061 | -1.45329321 |
| N  | 3.17563689  | 1.69191903  | 0.00011917  |

|   |             |             |             |
|---|-------------|-------------|-------------|
| N | 2.88450125  | -1.96119205 | -0.00011663 |
| C | 2.42096074  | 1.69925340  | 1.23944627  |
| H | 1.61577112  | 2.46309548  | 1.30242760  |
| H | 3.11284882  | 1.86014421  | 2.08268229  |
| C | 2.42096855  | 1.69941278  | -1.23921172 |
| H | 3.11286193  | 1.86041202  | -2.08242269 |
| H | 1.61577932  | 2.46326295  | -1.30209989 |
| C | 3.07371193  | -1.21380033 | 1.22873077  |
| H | 4.00328814  | -0.60750665 | 1.27558843  |
| H | 3.05357026  | -1.90729730 | 2.08416311  |
| C | 3.07371967  | -1.21364231 | -1.22886672 |
| H | 3.05358339  | -1.90702927 | -2.08438837 |
| H | 4.00329617  | -0.60734261 | -1.27564056 |
| H | 1.31691538  | -0.04629103 | -2.83939470 |
| H | -1.31691550 | -0.04665247 | 2.83938949  |
| H | -3.41318098 | -2.83595069 | -0.00019271 |
| H | 1.31689750  | -0.04665617 | 2.83939778  |
| H | -3.93085765 | 2.37918702  | 0.00014099  |
| H | 3.93086435  | 2.37917596  | 0.00016574  |
| H | 3.41317302  | -2.83596029 | -0.00017122 |
| H | -1.31689762 | -0.04628733 | -2.83940299 |
| H | -0.00000186 | -2.20054838 | -0.39069911 |
| H | -0.00000432 | -2.20059860 | 0.39041689  |

### TS<sub>CD</sub>

|    |             |             |             |
|----|-------------|-------------|-------------|
| Ni | 0.02020672  | -0.12178762 | -0.00026964 |
| P  | 1.66313672  | 0.14566538  | -1.45694264 |
| P  | 1.66291272  | 0.14178638  | 1.45743036  |
| N  | 2.71969872  | -1.92306362 | -0.00235064 |
| N  | 3.34453572  | 1.68737938  | 0.00219436  |
| C  | 2.98117172  | -1.19317162 | -1.23185964 |
| H  | 2.90442472  | -1.88214762 | -2.08751364 |
| H  | 3.96248672  | -0.67621162 | -1.26719264 |
| C  | 2.98087572  | -1.19659862 | 1.22922936  |
| H  | 3.96223672  | -0.67984262 | 1.26635336  |
| H  | 2.90373672  | -1.88789162 | 2.08298036  |
| C  | 2.59178872  | 1.76685938  | -1.23659764 |
| H  | 3.29421072  | 1.86894638  | -2.08032164 |
| H  | 1.85714472  | 2.59864438  | -1.29521464 |
| C  | 2.59164972  | 1.76352838  | 1.24110736  |
| H  | 1.85692972  | 2.59510338  | 1.30184436  |
| H  | 3.29398972  | 1.86351038  | 2.08515036  |
| P  | -1.62273728 | 0.14598938  | -1.45694464 |
| P  | -1.62282428 | 0.14152438  | 1.45727536  |
| N  | -3.30472528 | 1.68701738  | 0.00250536  |
| N  | -2.67901828 | -1.92329962 | -0.00303964 |
| C  | -2.55170128 | 1.76702438  | -1.23606764 |
| H  | -1.81711628 | 2.59889338  | -1.29417064 |
| H  | -3.25390428 | 1.86937138  | -2.07993564 |
| C  | -2.55205328 | 1.76301438  | 1.24154836  |

|   |             |             |             |
|---|-------------|-------------|-------------|
| H | -3.25452328 | 1.86232138  | 2.08556536  |
| H | -1.81770728 | 2.59488638  | 1.30270136  |
| C | -2.94061228 | -1.19302862 | -1.23234364 |
| H | -3.92197028 | -0.67614062 | -1.26747764 |
| H | -2.86383428 | -1.88175662 | -2.08819664 |
| C | -2.94035528 | -1.19714762 | 1.22874336  |
| H | -2.86293528 | -1.88863562 | 2.08231736  |
| H | -3.92192228 | -0.68079162 | 1.26605036  |
| H | -1.29953628 | 0.12436838  | 2.84414836  |
| H | 1.33985872  | 0.13190338  | -2.84385764 |
| H | 3.16726372  | -2.84240262 | -0.00358964 |
| H | -1.29957528 | 0.13309938  | -2.84389964 |
| H | 4.15522672  | 2.30848338  | 0.00308036  |
| H | -4.11558928 | 2.30789538  | 0.00339736  |
| H | -3.12685128 | -2.84252462 | -0.00453464 |
| H | 1.33958872  | 0.12530538  | 2.84430836  |
| H | -0.40860219 | -2.20910413 | -0.00345235 |
| H | 0.36885775  | -2.20892864 | -0.00321837 |

## D

|    |             |             |             |
|----|-------------|-------------|-------------|
| Ni | -0.02143286 | -0.00811898 | -0.24560427 |
| P  | 2.20250576  | -0.15025195 | -0.36263480 |
| P  | 0.48402010  | 2.15068790  | -0.04421859 |
| N  | 1.97230114  | 1.14953837  | 2.02460890  |
| N  | 2.82441898  | 2.27308840  | -1.41791223 |
| C  | 2.99165589  | 0.48548999  | 1.22053897  |
| H  | 3.36620721  | -0.39145236 | 1.76707656  |
| H  | 3.85022149  | 1.12023947  | 0.92489791  |
| C  | 1.51063383  | 2.43230968  | 1.50672040  |
| H  | 2.31097906  | 3.15007038  | 1.23770639  |
| H  | 0.84596837  | 2.89989260  | 2.24680960  |
| C  | 2.94792104  | 0.86539906  | -1.75558241 |
| H  | 4.01402611  | 0.60036445  | -1.81126511 |
| H  | 2.46582168  | 0.55542484  | -2.70479588 |
| C  | 1.49130973  | 2.84920269  | -1.46542130 |
| H  | 0.92736145  | 2.67625691  | -2.40439769 |
| H  | 1.56318364  | 3.93509771  | -1.30536602 |
| P  | -0.51702105 | -2.17741869 | -0.33757170 |
| P  | -2.24913962 | 0.13161015  | -0.24557022 |
| N  | -2.91098321 | -2.11684323 | -1.61784679 |
| N  | -1.91789245 | -1.50016025 | 1.91451268  |
| C  | -1.57985198 | -2.66861583 | -1.80436436 |
| H  | -1.05554998 | -2.35455496 | -2.72959128 |
| H  | -1.64221564 | -3.76680286 | -1.80299472 |
| C  | -3.05099644 | -0.67582043 | -1.73988794 |
| H  | -4.11891252 | -0.41387573 | -1.71138030 |
| H  | -2.61024322 | -0.22644165 | -2.65274817 |
| C  | -1.47903386 | -2.69032804 | 1.19536006  |
| H  | -2.29046063 | -3.36446957 | 0.85620262  |
| H  | -0.78499841 | -3.25839097 | 1.83074804  |



|   |             |             |             |
|---|-------------|-------------|-------------|
| C | -2.97047878 | -0.73235377 | 1.25951092  |
| H | -3.32088131 | 0.05382221  | 1.94297510  |
| H | -3.84114389 | -1.32237826 | 0.91128134  |
| H | -2.84634899 | 1.42838500  | -0.24315581 |
| H | 2.78820265  | -1.43491934 | -0.57423258 |
| H | 2.28295746  | 1.24374778  | 2.99411255  |
| H | 0.55771890  | -3.11324926 | -0.41910943 |
| H | 3.50407324  | 2.84535530  | -1.91976627 |
| H | -3.60965500 | -2.61478246 | -2.17027199 |
| H | -2.18690796 | -1.73697424 | 2.87200546  |
| H | -0.58538201 | 3.09075337  | 0.05531797  |

### TS<sub>DE</sub>

|    |             |             |             |
|----|-------------|-------------|-------------|
| Ni | 0.00000000  | 0.00000000  | 0.00000000  |
| P  | 2.28510830  | 0.00000000  | 0.00000000  |
| H  | 2.97041416  | 1.25340531  | 0.00000000  |
| P  | -0.24291890 | 2.20775813  | -0.53084911 |
| H  | 0.88716950  | 3.07076614  | -0.39655937 |
| P  | -2.21640784 | -0.05590692 | -0.54662404 |
| H  | -2.91748850 | -1.29461955 | -0.42804858 |
| P  | 0.31167320  | -2.26412239 | -0.02133665 |
| H  | -0.83639159 | -3.11387239 | -0.04164154 |
| C  | -0.81599523 | 2.39657419  | -2.40530625 |
| N  | -2.13709859 | 1.88179923  | -2.65640254 |
| H  | -2.89049873 | 2.53804560  | -2.48848115 |
| C  | -1.60360988 | 3.07278259  | 0.52414936  |
| N  | -2.91928607 | 2.54303207  | 0.19760825  |
| H  | -3.68409064 | 3.20894529  | 0.21509716  |
| C  | -2.46988423 | 0.50120655  | -2.41796706 |
| C  | -3.26509377 | 1.16481415  | 0.51268857  |
| C  | 1.35753688  | -2.86649727 | 1.53131761  |
| N  | 2.71268142  | -2.37951802 | 1.54403023  |
| H  | 3.37596203  | -2.95108531 | 1.03393132  |
| C  | 1.31584422  | -2.81096179 | -1.57516107 |
| N  | 2.68588674  | -2.32770706 | -1.48804491 |
| H  | 3.39836514  | -2.94547730 | -1.86198802 |
| C  | 3.00755937  | -0.97006990 | 1.55098479  |
| C  | 2.97959579  | -0.90384401 | -1.55623774 |
| H  | -0.77362974 | 3.45827874  | -2.66222957 |
| H  | -0.05709549 | 1.86408705  | -2.98865979 |
| H  | -1.83636910 | -0.17418624 | -3.00301025 |
| H  | -3.51461552 | 0.31788969  | -2.68247281 |
| H  | -1.30791315 | 2.92884333  | 1.57504857  |
| H  | -1.57753772 | 4.14407943  | 0.30247116  |
| H  | -4.32158488 | 0.99364692  | 0.28485235  |
| H  | -3.08657457 | 0.88408294  | 1.56235479  |
| H  | 4.08953032  | -0.81419989 | 1.56388691  |
| H  | 2.56669010  | -0.46723701 | 2.41690944  |
| H  | 0.79042232  | -2.51119864 | 2.39685639  |
| H  | 1.35295059  | -3.95962995 | 1.52922417  |

|   |             |             |             |
|---|-------------|-------------|-------------|
| H | 2.54178012  | -0.39610218 | -2.43113315 |
| H | 4.06368266  | -0.75733612 | -1.58377058 |
| H | 1.31811264  | -3.90439895 | -1.61585535 |
| H | 0.76169332  | -2.43551902 | -2.45090589 |
| N | -0.26342045 | 0.20900190  | 2.22473097  |
| C | -0.42311664 | 0.33618302  | 3.57943466  |
| C | -0.59437525 | 0.47249236  | 5.02798519  |
| H | 0.35509512  | 0.25561332  | 5.54936171  |
| H | -0.90725183 | 1.50047400  | 5.28312498  |
| H | -1.36295494 | -0.23263163 | 5.39166404  |

## E

|    |             |             |             |
|----|-------------|-------------|-------------|
| Ni | 0.18246986  | 0.27164198  | 0.43497931  |
| P  | 2.32135913  | 0.07001823  | -0.12470323 |
| H  | 2.84327263  | 1.36011747  | -0.24400804 |
| P  | -0.03031972 | 2.23643974  | -0.57333143 |
| H  | 1.22938087  | 2.84673821  | -0.56129910 |
| P  | -1.96954669 | 0.07107494  | -0.06754672 |
| H  | -2.38142956 | -1.19205457 | 0.37040049  |
| P  | 0.21474424  | -1.94724996 | 0.33958991  |
| H  | -1.08692188 | -2.39578127 | 0.60361064  |
| C  | -0.60854875 | 2.05730667  | -2.34141416 |
| N  | -2.00565070 | 1.57181595  | -2.42939245 |
| H  | -2.58049855 | 2.20318038  | -1.90945478 |
| C  | -1.27077981 | 3.28457201  | 0.36094554  |
| N  | -2.66724646 | 2.76774547  | 0.23112843  |
| H  | -3.26085054 | 3.41138614  | 0.71971738  |
| C  | -2.26402507 | 0.20640729  | -1.91012712 |
| C  | -2.94287870 | 1.41560271  | 0.80258001  |
| C  | 1.40324184  | -2.60532935 | 1.62347759  |
| N  | 2.82860482  | -2.30667901 | 1.28649234  |
| H  | 3.01070024  | -2.70507458 | 0.38461425  |
| C  | 0.74148158  | -2.56535891 | -1.35154906 |
| N  | 2.16552538  | -2.26970921 | -1.64908624 |
| H  | 2.36811391  | -2.67837361 | -2.53852859 |
| C  | 3.22768458  | -0.86881090 | 1.22136703  |
| C  | 2.54014103  | -0.83698276 | -1.74817837 |
| H  | -0.57481158 | 3.02309850  | -2.80047279 |
| H  | 0.04426571  | 1.38338434  | -2.85989873 |
| H  | -1.63886315 | -0.49514905 | -2.41837676 |
| H  | -3.29360518 | -0.01831646 | -2.09933975 |
| H  | -0.99230847 | 3.31768249  | 1.39436271  |
| H  | -1.25086072 | 4.27037506  | -0.05442322 |
| H  | -3.98530235 | 1.21982703  | 0.66590928  |
| H  | -2.70086398 | 1.40361558  | 1.84680041  |
| H  | 4.27505412  | -0.83654700 | 1.00313160  |
| H  | 3.03432967  | -0.39814002 | 2.16122459  |
| H  | 1.15546516  | -2.18056892 | 2.57631048  |
| H  | 1.29855927  | -3.67034219 | 1.66315285  |
| H  | 1.94974108  | -0.35561669 | -2.49714907 |

|   |             |             |             |
|---|-------------|-------------|-------------|
| H | 3.57572540  | -0.79789436 | -2.01657923 |
| H | 0.62203337  | -3.62803671 | -1.36364088 |
| H | 0.11887290  | -2.11915380 | -2.10050706 |
| N | 0.36803994  | 0.81673321  | 2.19115200  |
| C | -0.35850497 | 0.19305260  | 3.17496149  |
| C | -1.02195826 | -0.36652872 | 4.42240336  |
| H | -0.28676671 | -0.85918187 | 5.02566929  |
| H | -1.46540889 | 0.43255845  | 4.97800649  |
| H | -1.77830538 | -1.06981412 | 4.14204654  |
